# Supplementary material for: Lithium attenuates blood–brain barrier damage and brain edema following intracerebral hemorrhage via an endothelial Wnt/β‐catenin signaling‐dependent mechanism in mice
Source: PubMed Central journal article supplement (PMC9062576; doi:10.1111/cns.13832), 2022-03-28

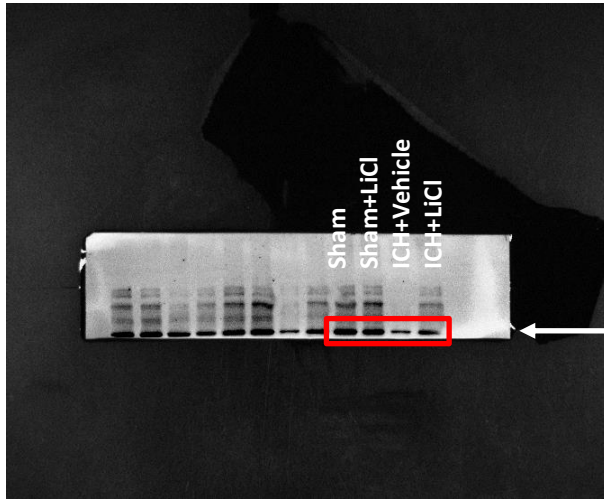

**Full unedited blot for  
Figure 3A ZO-1**

**187kDa**

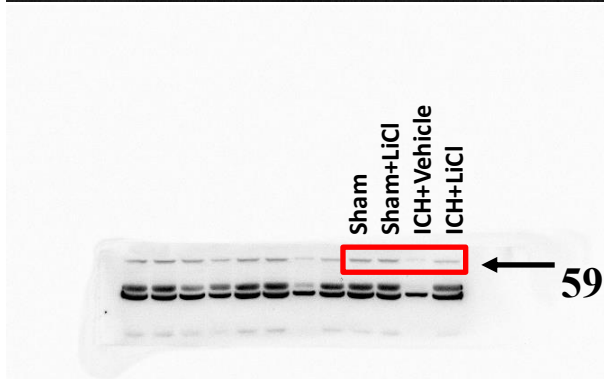

**Full unedited blot for  
Figure 3A Occludin**

**59kDa**

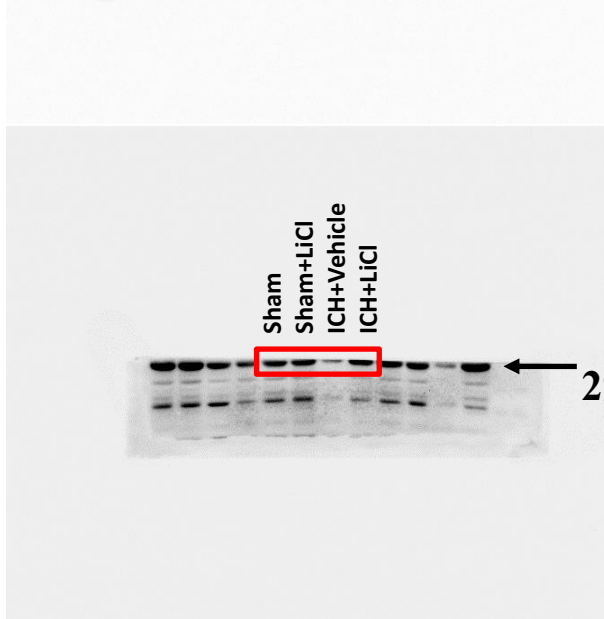

**Full unedited blot for  
Figure 3A Claudin-5**

**29kDa**

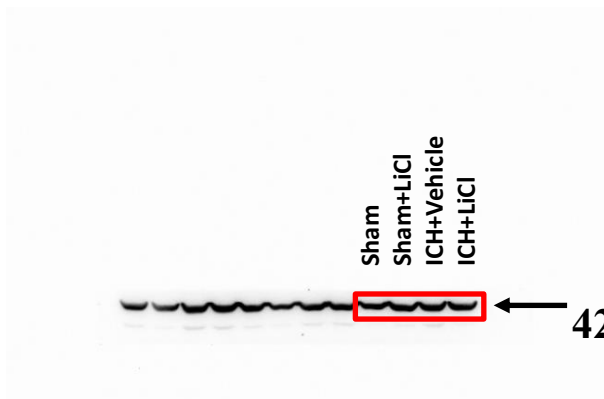

**Full unedited blot for  
Figure 3A  $\beta$ -actin**

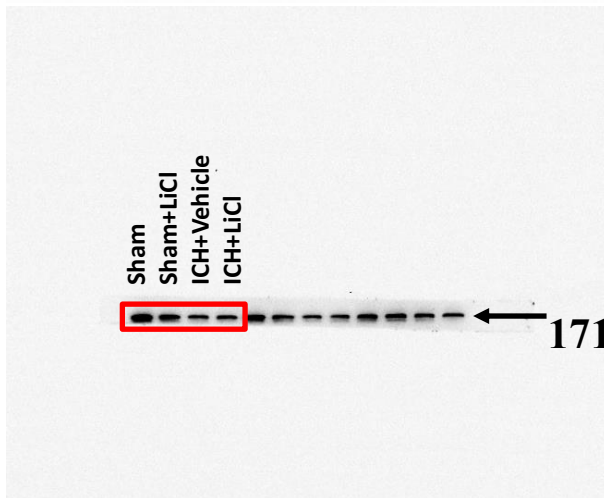

**Full unedited blot for  
Figure 3A Laminin**

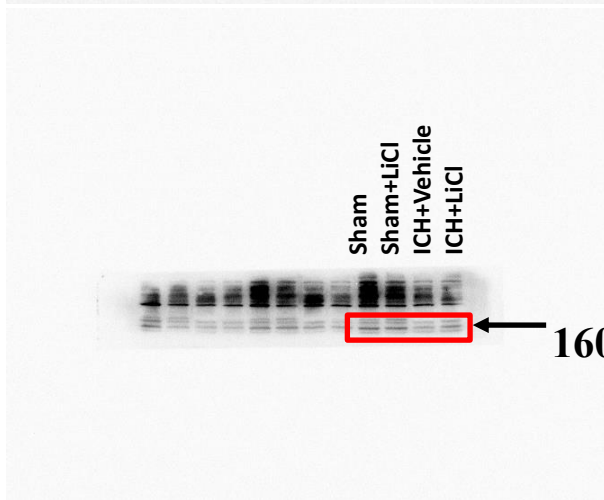

**Full unedited blot for  
Figure 3A Collagen IV**

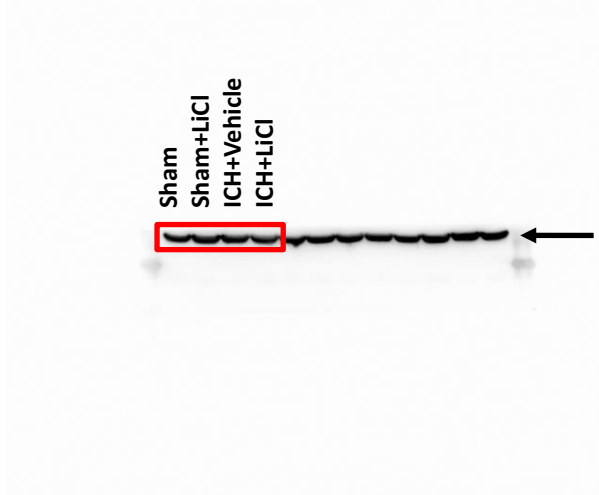

Full unedited blot for  
Figure 3A  $\beta$ -actin

Negative staining images with isotype specific IgG is recommended to exclude nonspecific labeling.

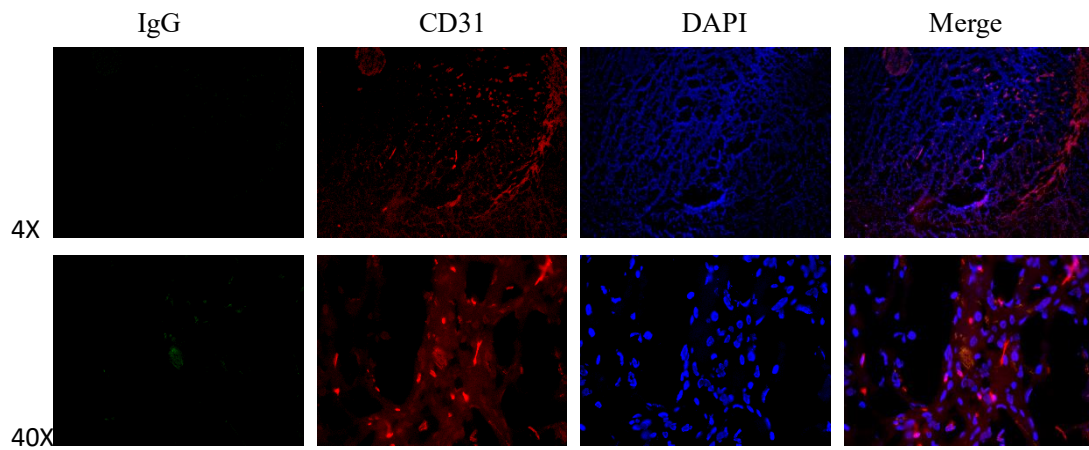

Supplement: CNS-28-862-s001.pdf [file CNS-28-862-s001.pdf]
